# Supplementary material for: Rapid Elimination of Aedes aegypti and Culex quinquefasciatus Mosquitoes from Puerco Island, Palawan, Philippines with Odor-Baited Traps
Source: Insects. 2023 Aug 28;14(9):730. doi: 10.3390/insects14090730 (PMC10531793; doi:10.3390/insects14090730)
Supplement: Supplementary file 1 [file insects-14-00730-s001.zip › Data S1.xlsx]

## Sheet: MONITORING TRAPS
PUERCO ISLAND MOSQUITO PROJECT - RAW DATA
	MONITORING TRAP NUMBER
DATE	11	15	17	21	29	35	38	42	57	64	TOTAL
2022-07-10	0	ND	27	20	22	0	ND	180	ND	NO	249		ND= NOT DONE
2022-07-13	91	149	54	39	0	0	222	67	ND	NO	622		NO= NOT IN OPERATION
2022-07-16	54	98	79	40	70	59	186	79	ND	NO	665
2022-07-19	55	46	75	34	71	43	90	142	7	NO	563
2022-07-22	53	22	40	21	63	25	34	68	1	NO	327
2022-07-25	60	13	55	9	170	40	36	75	8	NO	466
2022-07-28	44	14	55	22	60	36	43	31	0	NO	305
2022-07-31	10	12	20	30	53	48	42	55	4	NO	274
2022-08-03	22	8	23	33	20	55	45	17	0	NO	223
2022-08-06	42	10	24	8	48	21	37	11	0	NO	201
2022-08-09	15	14	21	35	51	40	38	48	3	NO	265
2022-08-12	15	10	8	33	11	18	20	11	3	NO	129
2022-08-15	10	8	5	10	30	21	35	18	0	NO	137
2022-08-18	8	10	8	12	23	15	20	35	5	NO	136
2022-08-21	38	32	28	11	35	46	35	88	10	NO	323
2022-08-24	22	29	23	36	55	41	49	26	5	NO	286
2022-08-27	10	21	18	10	35	15	40	18	6	NO	173
2022-08-30	26	15	25	20	30	11	42	21	0	NO	190
2022-09-02	13	31	15	20	29	23	44	28	8	NO	211
2022-09-05	21	18	9	31	21	16	31	31	2	NO	180
2022-09-08	13	14	3	13	72	34	11	14	3	NO	177
2022-09-11	9	8	2	10	18	20	8	12	3	NO	90
2022-09-14	38	20	18	15	28	23	25	31	4	NO	202
2022-09-17	18	12	9	25	13	8	10	20	3	NO	118
2022-09-20	13	10	13	20	10	15	8	25	0	NO	114
2022-09-23	7	8	5	10	8	6	13	6	0	NO	63
2022-09-26	22	7	12	5	11	10	25	18	0	NO	110
2022-09-29	5	6	8	4	6	4	12	11	2	NO	58
2022-10-02	5	7	5	6	8	6	8	10	2	NO	57
2022-10-05	3	6	4	4	6	5	8	7	0	NO	43
2022-10-08	6	4	3	3	5	4	6	8	0	NO	39
2022-10-11	4	3	2	2	4	3	6	8	2	NO	34
2022-10-14	3	4	2	4	4	1	3	2	0	NO	23
2022-10-17	2	3	2	3	2	2	4	3	2	NO	23
2022-10-20	0	0	3	2	3	0	0	1	0	NO	9
2022-10-23	2	2	0	1	2	0	0	2	0	NO	9
2022-10-26	2	0	0	2	0	0	0	3	0	NO	7
2022-10-29	0	2	0	2	0	2	0	3	0	NO	9
2022-11-01	1	0	0	0	0	0	2	2	0	NO	5
2022-11-04	1	2	0	0	0	0	0	2	0	NO	5
2022-11-07	1	2	0	0	2	1	0	0	0	NO	6
2022-11-10	0	0	2	2	2	0	0	0	0	NO	6
2022-11-13	2	0	0	2	0	0	0	0	0	NO	4
2022-11-16	2	0	0	0	2	0	0	2	0	NO	6
2022-11-19	0	1	0	0	4	0	1	0	0	7	13		(8Culex;5Aedes)
2022-11-22	0	0	0	0	2	0	0	1	0	2	5		(4Culex;1Aedes)
2022-11-25	0	0	0	0	0	0	0	0	0	2	2		(2Culex;0Aedes)
2022-11-28	0	0	0	0	1	0	0	0	0	1	2		(1Culex;1Aedes)
2022-12-01	0	0	0	0	0	0	0	0	0	2	2		(2Culex;0Aedes)
2022-12-04	0	0	0	0	0	0	0	0	0	0	0		(0Culex;0Aedes)
2022-12-07	0	0	0	0	0	0	0	0	0	0	0		(0Culex;0Aedes)
2022-12-10	0	0	0	0	0	0	0	0	0	0	0		(0Culex;0Aedes)
2022-12-13	0	0	0	0	0	0	0	0	0	0	0		(0Culex;0Aedes)
2022-12-16	0	0	0	0	0	0	0	0	0	0	0		(0Culex;0Aedes)
2022-12-19	0	0	0	0	0	0	0	0	0	0	0		(0Culex;0Aedes)
2022-12-22	2	0	0	0	0	0	0	0	0	1	3		(3Culex;0Aedes)
2022-12-25	0	0	0	0	0	0	0	0	0	0	0		(0Culex;0Aedes)
2022-12-28	0	0	0	0	0	0	0	0	0	0	0		(0Culex;0Aedes)
2022-12-31	0	0	0	0	0	0	0	0	0	0	0		(0Culex;0Aedes)
2023-01-03	0	0	0	0	0	0	0	0	0	0	0		(0Culex;0Aedes)
2023-01-06	0	0	0	0	0	0	0	0	0	0	0		(0Culex;0Aedes)
2023-01-09	0	0	0	0	0	0	0	0	0	0	0		(0Culex;0Aedes)
2023-01-12	0	0	0	0	0	0	0	0	0	0	0		(0Culex;0Aedes)
2023-01-15	0	0	0	0	0	0	0	0	0	0	0		(0Culex;0Aedes)
2023-01-18	0	0	0	0	0	0	0	0	0	0	0		(0Culex;0Aedes)
2023-01-21	0	0	0	0	0	0	0	0	0	0	0		(0Culex;0Aedes)
2023-01-24	0	0	0	0	0	0	0	0	0	0	0		(0Culex;0Aedes)
2023-01-27	0	0	0	0	0	0	0	0	0	0	0		(0Culex;0Aedes)
2023-01-30	0	0	0	0	0	0	0	0	0	0	0		(0Culex;0Aedes)
2023-02-02	0	0	0	0	0	0	0	0	0	0	0		(0Culex;0Aedes)
2023-02-05	0	0	0	0	0	0	0	0	0	0	0		(0Culex;0Aedes)
2023-02-08	0	0	0	0	0	0	0	0	0	0	0		(0Culex;0Aedes)
2023-02-11	0	0	0	0	0	0	0	0	0	0	0		(0Culex;0Aedes)
2023-02-14	0	0	0	0	0	0	0	0	0	0	0		(0Culex;0Aedes)
2023-02-17	0	0	0	0	0	0	0	0	0	0	0		(0Culex;0Aedes)
2023-02-20	0	0	0	0	0	0	0	0	0	0	0		(0Culex;0Aedes)
2023-02-23	0	0	0	0	0	0	0	0	0	0	0		(0Culex;0Aedes)
2023-02-26	0	0	0	0	0	0	0	0	0	0	0		(0Culex;0Aedes)
2023-03-01	0	0	0	0	0	0	0	0	0	0	0		(0Culex;0Aedes)
2023-03-04	0	0	0	0	0	0	0	0	0	0	0		(0Culex;0Aedes)
2023-03-07	0	0	0	0	0	0	0	0	0	0	0		(0Culex;0Aedes)
2023-03-10	0	0	0	0	0	0	0	0	0	0	0		(0Culex;0Aedes)
2023-03-13	0	0	0	0	0	0	0	0	0	0	0		(0Culex;0Aedes)
2023-03-16	0	0	0	0	0	0	0	0	0	0	0		(0Culex;0Aedes)
2023-03-19	0	0	0	0	0	0	0	0	0	0	0		(0Culex;0Aedes)
2023-03-22	0	0	0	0	0	0	0	0	0	0	0		(0Culex;0Aedes)
2023-03-25	0	0	0	0	0	0	0	0	0	0	0		(0Culex;0Aedes)

## Sheet: TRAPS 1-75
PUERCO ISLAND MOSQUITO PROJECT - RAW DATA
		TRAP NUMBER
DATE		1	2	3	4	5	6	7	8	9	10	11	12	13	14	15	16	17	18	19	20	21	22	23	24	25	26	27	28	29	30	31	32	33	34	35	36	37	38	39	40	41	42	43	44	45	46	47	48
2022-10-17		3	8	2	5	7	6	5	3	2	6	2	2	4	5	3	6	2	8	4	4	3	5	9	4	7	6	5	4	2	6	4	4	3	2	2	3	3	4	4	6	5	3	5	6	5	6	3	4
2022-10-20		2	1	2	0	3	2	2	1	2	3	0	0	0	0	0	0	3	0	0	0	2	0	0	0	4	0	0	0	3	2	0	0	4	6	0	0	0	0	3	2	1	1	2	0	0	0	0	0
2022-11-18	Ae	0	5	0	0	0	0	0	0	0	0	0	0	3	0	0	1	0	0	0	0	0	2	1	2	0	0	0	0	0	0	0	0	0	0	0	0	0		0	0	0	0	0	1	0	0	0	0
	Cu	0	2	0	0	0	3	0	0	14	3	0	0	3	0	0	0	0	0	0	1	0	1	1	0	0	8	0	0	0	0	0	0	0	0	0	1	0		0	0	0	0	0	0	0	0	0	0
2022-12-07	Ae	0	0	0	0	0	0	0	0	0	0	0	0	0	0	0	0	0	0	0	0	0	0	0	0	0	0	0	0	0	0	0	0	0	0	0	0	0	0	0	0	0	0	0	0	0	0	0	0
	Cu	0	0	0	0	0	0	0	0	1	0	0	0	0	0	0	0	0	0	0	0	0	0	0	0	0	0	0	2	0	0	0	0	0	0	0	0	0	0	0	0	0	0	0	0	0	0	0	0
2022-12-22	Ae	0	0	0	0	0	0	0	0	0	0	0	0	0	0	0	0	0	0	0	0	0	0	0	0	0	0	0	0	0	0	0	0	0	0	0	0	0	0	0	0	0	0	0	0	0	0	0	0
	Cu	0	0	0	0	0	0	0	0	0	0	2	0	0	0	0	0	0	0	0	0	0	0	0	0	0	0	0	0	0	0	0	0	0	0	0	0	0	0	0	0	0	0	0	0	0	0	0	0
2022-01-05	Ae	0	0	0	0	0	0	0	0	0	0	0	0	0	0	0	0	0	0	0	0	0	0	0	0	0	0	0	0	0	0	0	0	0	0	0	0	0	0	0	0	0	0	0	0	0	0	0	0
	Cu	0	0	0	0	0	0	0	0	0	0	0	1	0	0	0	0	0	0	0	0	0	0	0	0	0	0	0	0	0	0	0	0	0	0	0	0	0	0	0	0	0	0	0	0	0	0	0	0
2023-02-23	Ae	0	0	0	0	0	0	0	0	0	0	0	0	0	0	0	0	0	0	0	0	0	0	0	0	0	0	0	0	0	0	0	0	0	0	0	0	0	0	0	0	0	0	0	0	0	0	0	0
	Cu	0	0	0	0	0	0	0	0	2	0	0	0	0	0	0	0	0	0	0	0	0	0	0	0	0	0	0	0	0	0	0	0	0	0	0	0	0	0	0	0	0	0	0	0	0	0	0	0
2023-03-07	Ae	0	0	0	0	0	0	0	0	0	0	0	0	0	0	0	0	0	0	0	0	0	0	0	0	0	0	0	0	0	0	0	0	0	0	0	0	0	0	0	0	0	0	0	0	0	0	0	0
	Cu	0	0	0	0	0	0	0	0	0	0	0	0	0	0	0	0	0	0	0	0	0	0	0	0	0	0	0	0	0	0	0	0	0	0	0	0	0	0	0	0	0	0	0	0	0	0	0	0
2023-03-22	Ae	0	0	0	0	0	0	0	0	0	0	0	0	0	0	0	0	0	0	0	0	0	0	0	0	0	0	0	0	0	0	0	0	0	0	0	0	0	0	0	0	0	0	0	0	0	0	0	0
	Cu	0	0	0	0	0	0	0	0	0	0	0	0	0	0	0	0	0	0	0	0	0	0	0	0	0	0	0	0	0	0	0	0	0	0	0	0	0	0	0	0	0	0	0	0	0	0	0	0
		MONITORING TRAP
	Ae = Aedes aegypti
	Cx = Culex quinquefasciatus
[truncated: 28 more columns]
